# Supplementary material
Source: PubMed Central journal article supplement (PMC3034611)
Supplement: f-67-00217-sup1.pdf [file f-67-00217-sup1.pdf]

**MKKT****AI****AI****AV****AL****AG****FAT****V****A****Q****A****S**→**RA****H****T****V****S****P****V****N****P****N****A****Q****P****T****T****K****A****V****M****N****W****L****A****H****L****P****N****R****T****E****S****R****V****M****S****G****A****F****G****G****Y****S****L****D****T****F****S****T****A****E****A**  
**D****R****I****K****Q****A****T****G****Q****L****P****A****I****Y****G****C****D****Y****A****R****G****W****L****E****P****E****K****I****A****D****T****I****D****Y****S****C****N****R****D****L****I****A****Y****W****K****S****G****I****P****Q****I****S****M****H****L****A****N****P****A****F****T****S****G****H****Y****K****T****Q****I****S****N****S****Q****Y****E****R****I**  
**L****D****S****S****T****P****E****G****K****R****L****E****A****M****L****S****K****I****A****D****G****L****Q****E****L****E****N****E****G****V****P****L****F****R****P****L****H****E****M****N****G****E****W****F****W****W****G****L****T****Q****Y****N****Q****K****D****S****E****R****I****S****L****Y****K****Q****L****Y****V****K****I****Y****D****Y****M****T**  
**K****T****R****G****L****D****H****L****L****W****Y****A****P****D****A****N****R****D****F****K****T****D****F****Y****P****G****A****S****Y****D****I****V****G****L****D****A****Y****F****D****D****P****Y****A****I****D****G****Y****E****E****L****T****S****L****N****K****P****F****A****F****T****E****V****G****P****Q****T****T****N****G****G****L****D****Y****A**  
**R****F****I****H****A****I****K****E****K****Y****P****K****T****T****Y****F****L****A****W****N****D****E****W****S****P****A****V****N****K****G****A****D****T****L****Y****L****H****P****W****T****L****N****K****G****E****I****W****D****G****D****S****L****T****P****V****V****E****H****H****H****H****H****H**

 *E. coli* ompA signal peptide

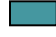

Residues generated from *Bgl*II cloning site

The purposed cleavage site is marked by an arrow.

 Residues encoded from gene ydhT

 Hexa-histidine tag
